# Supplementary material for: The K219T-Lamin mutation induces conduction defects through epigenetic inhibition of SCN5A in human cardiac laminopathy
Source: PubMed Central journal article supplement (PMC6531493; doi:10.1038/s41467-019-09929-w), 2019-05-22
Supplement: 41467_2019_9929_MOESM4_ESM.pdf [file 41467_2019_9929_MOESM4_ESM.pdf]

## **Description of Additional Supplementary Files**

File Name: Supplementary Movie 1

Description: Contracting CMs differentiated from K219T-iPSCs

File Name: Supplementary Movie 2

Description: Contracting CMs differentiated from CNTR-iPSCs
